# Supplementary material for: Metabolic Reprogramming of Mammary Epithelial Cells during TGF-β-Induced Epithelial-to-Mesenchymal Transition
Source: MDPI journal article supplement (doi:10.3390/metabo11090626), 2021-09-15
Supplement: s1 [file s1]

# Supplementary Material Metabolic reprogramming of mammary epithelial cells during TGF- $\beta$ -induced epithelial-to-mesenchymal transition

Wan Hua<sup>1,2\*</sup>, Sarantos Kostidis<sup>3\*</sup>, Oleg Mayboroda<sup>3</sup>, Martin Giera<sup>3</sup>, Marten Hornsveld<sup>1</sup> and Peter ten Dijke<sup>1¶</sup>

## Supplementary Figures

**A**

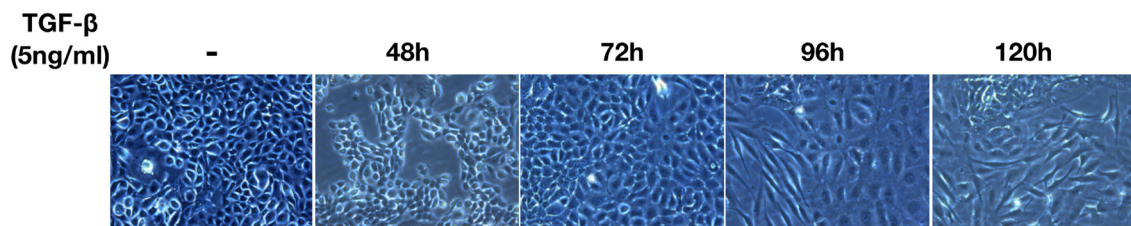

**B**

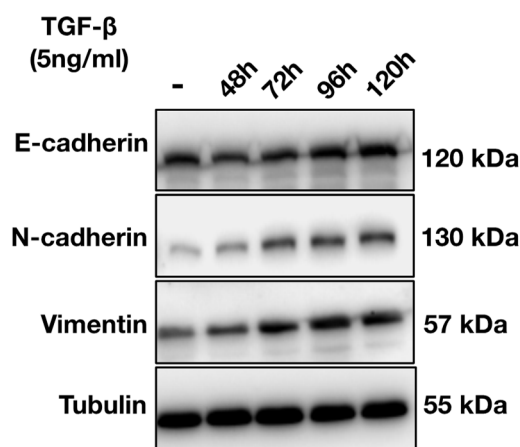

**Figure S1.** TGF- $\beta$  induces EMT of MCF10A-Ras cells. A. TGF- $\beta$  induced a morphological change in MCF10A-Ras cells from an epithelial to a spindle-shaped fibroblast-like mesenchymal phenotype. B. TGF- $\beta$  induced an increase in expression of N-cadherin and Vimentin in MCF10A-Ras cells for 48 h, 72 h, 96 h and 120 h.

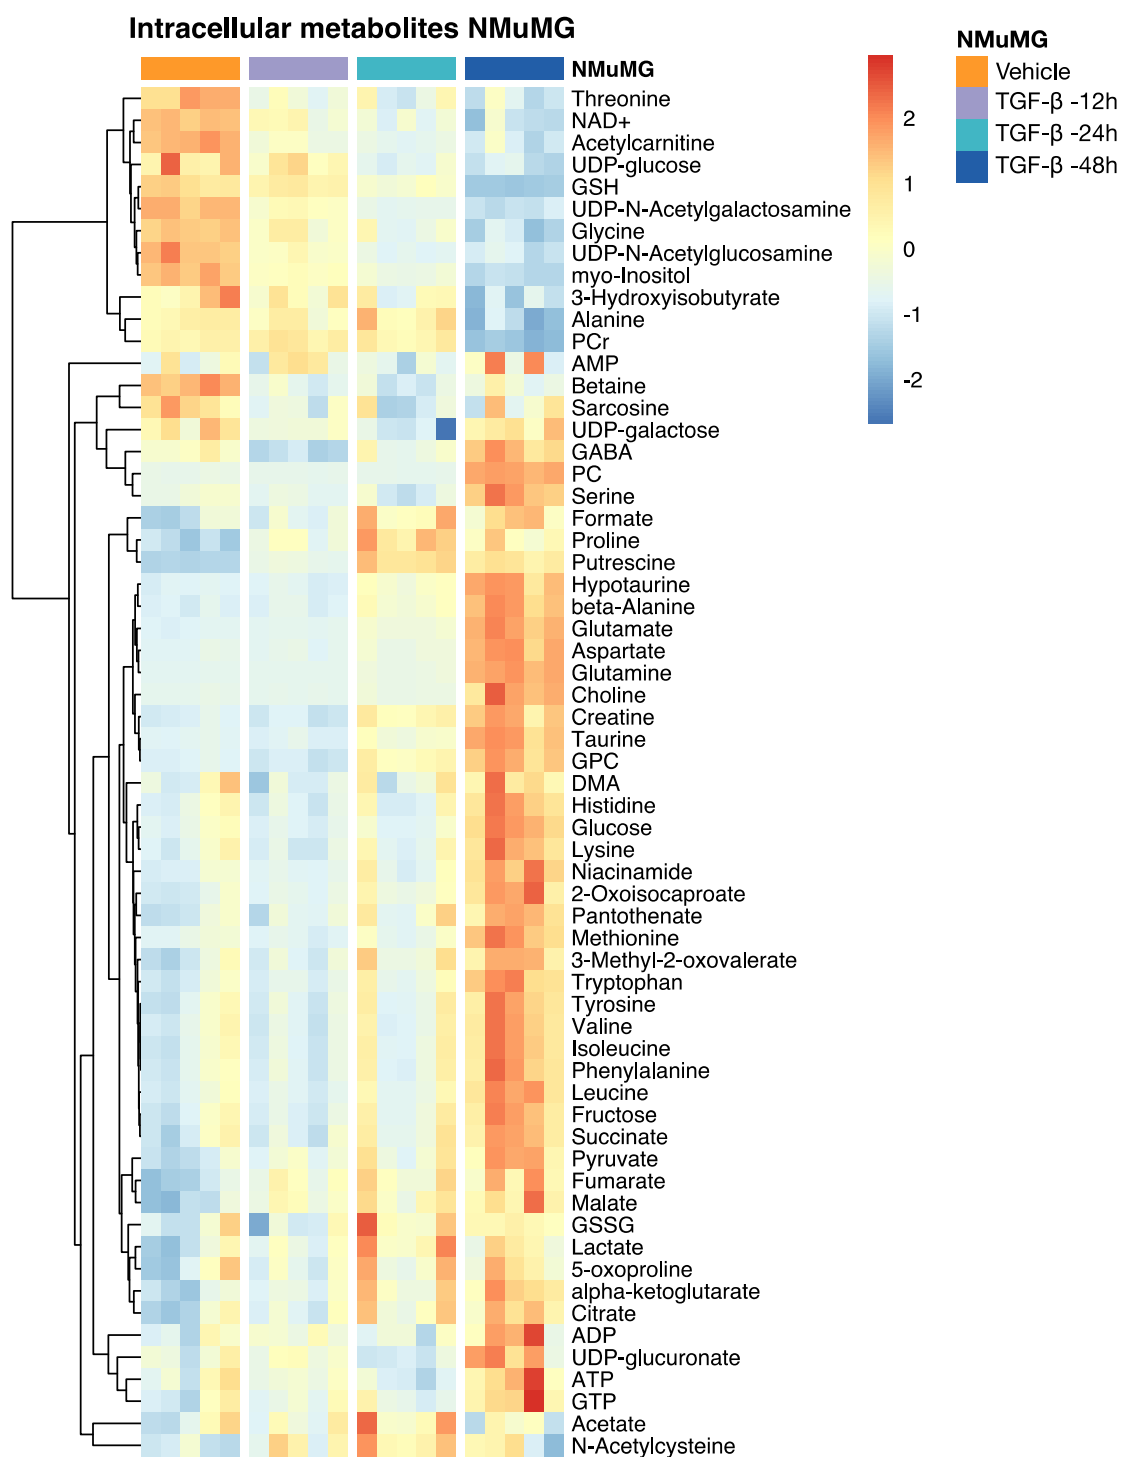

**Figure S2.** TGF- $\beta$  induced metabolic kinetic changes in intracellular metabolites in NMuMG cells. The treatment-induced changes in intracellular metabolites are compared to vehicle control-treated cells. Results from  $n = 5$  independent experiments are shown.

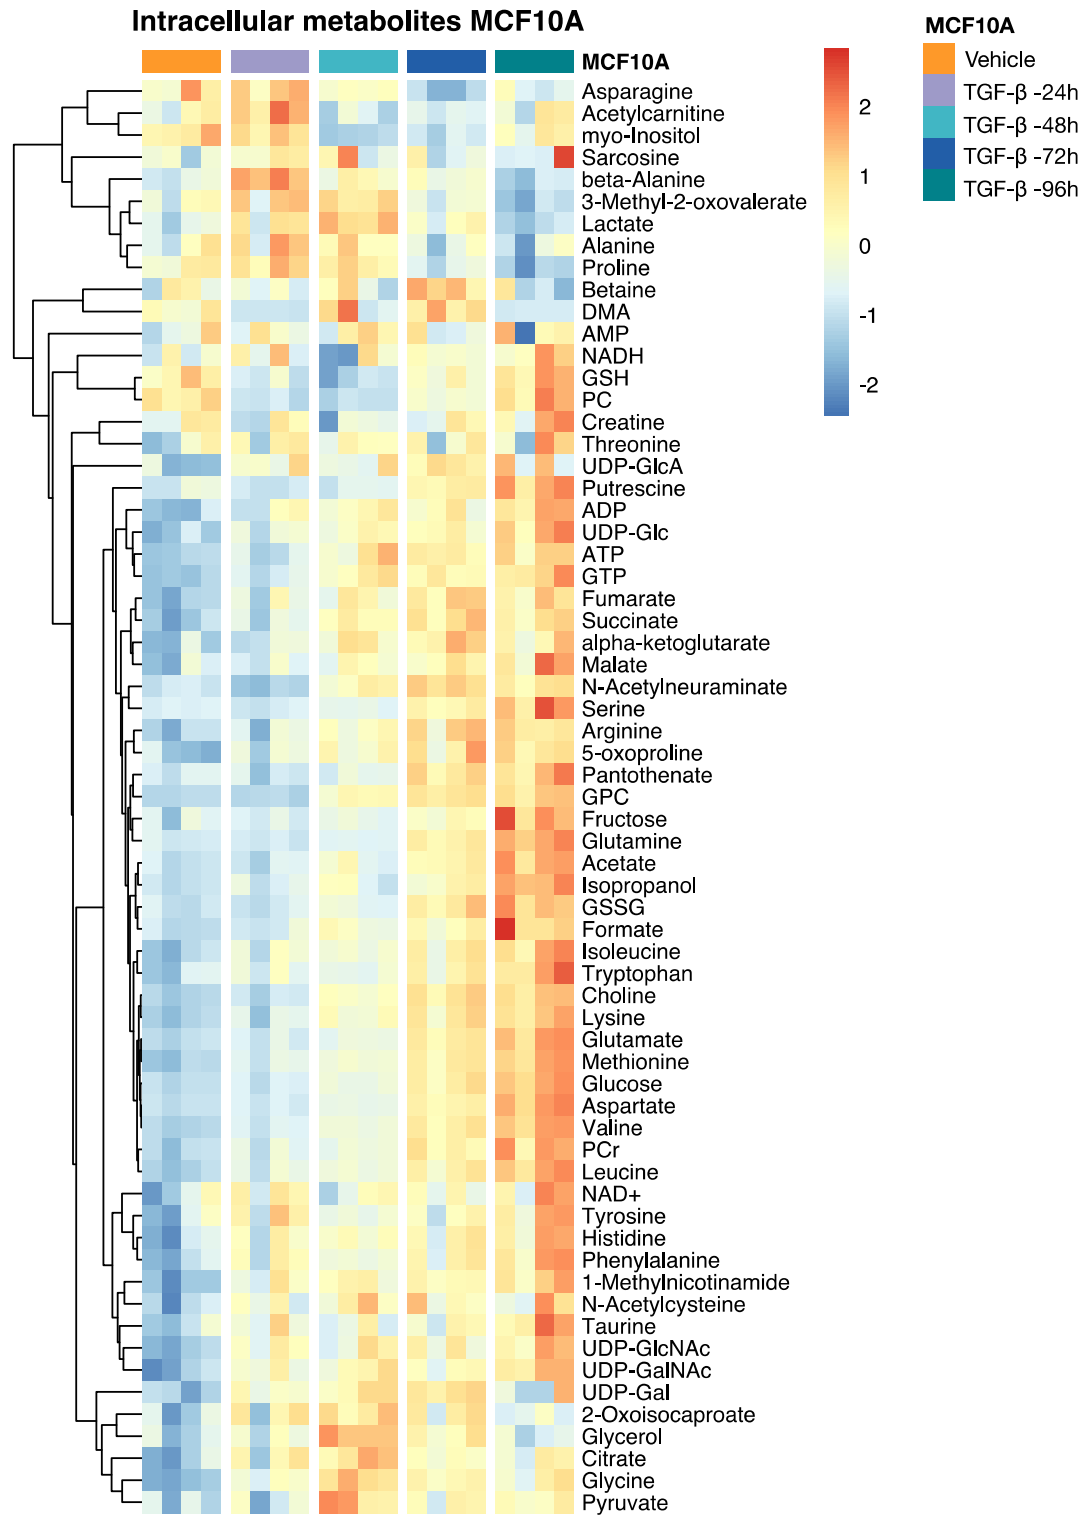

**Figure S3.** TGF- $\beta$  induced metabolic kinetic changes in intracellular metabolites in MCF10A-Ras cells.

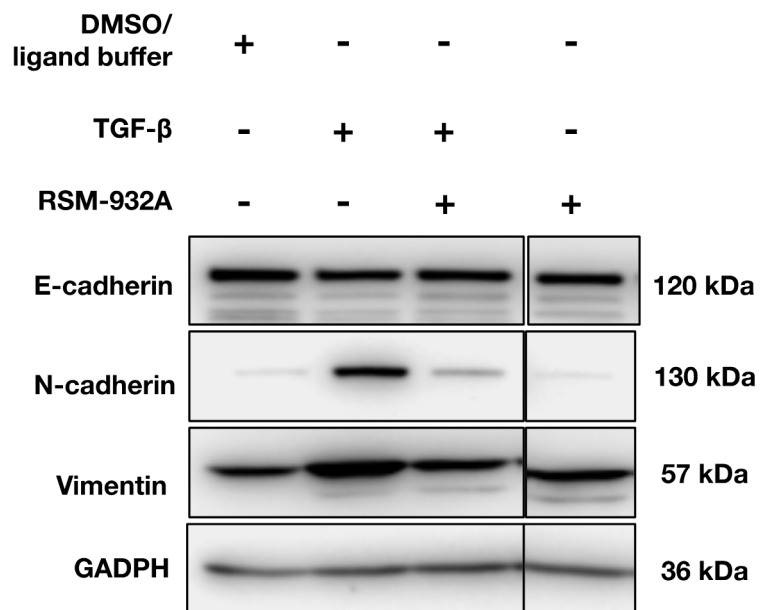

**Figure S4.** Effect of RSM-932A on TGF- $\beta$  induced an increase of expression of N-cadherin and Vimentin. RSM-932A was used at 10 $\mu$ M and TGF- $\beta$  at 5ng/mL (All samples were run on the same gel).

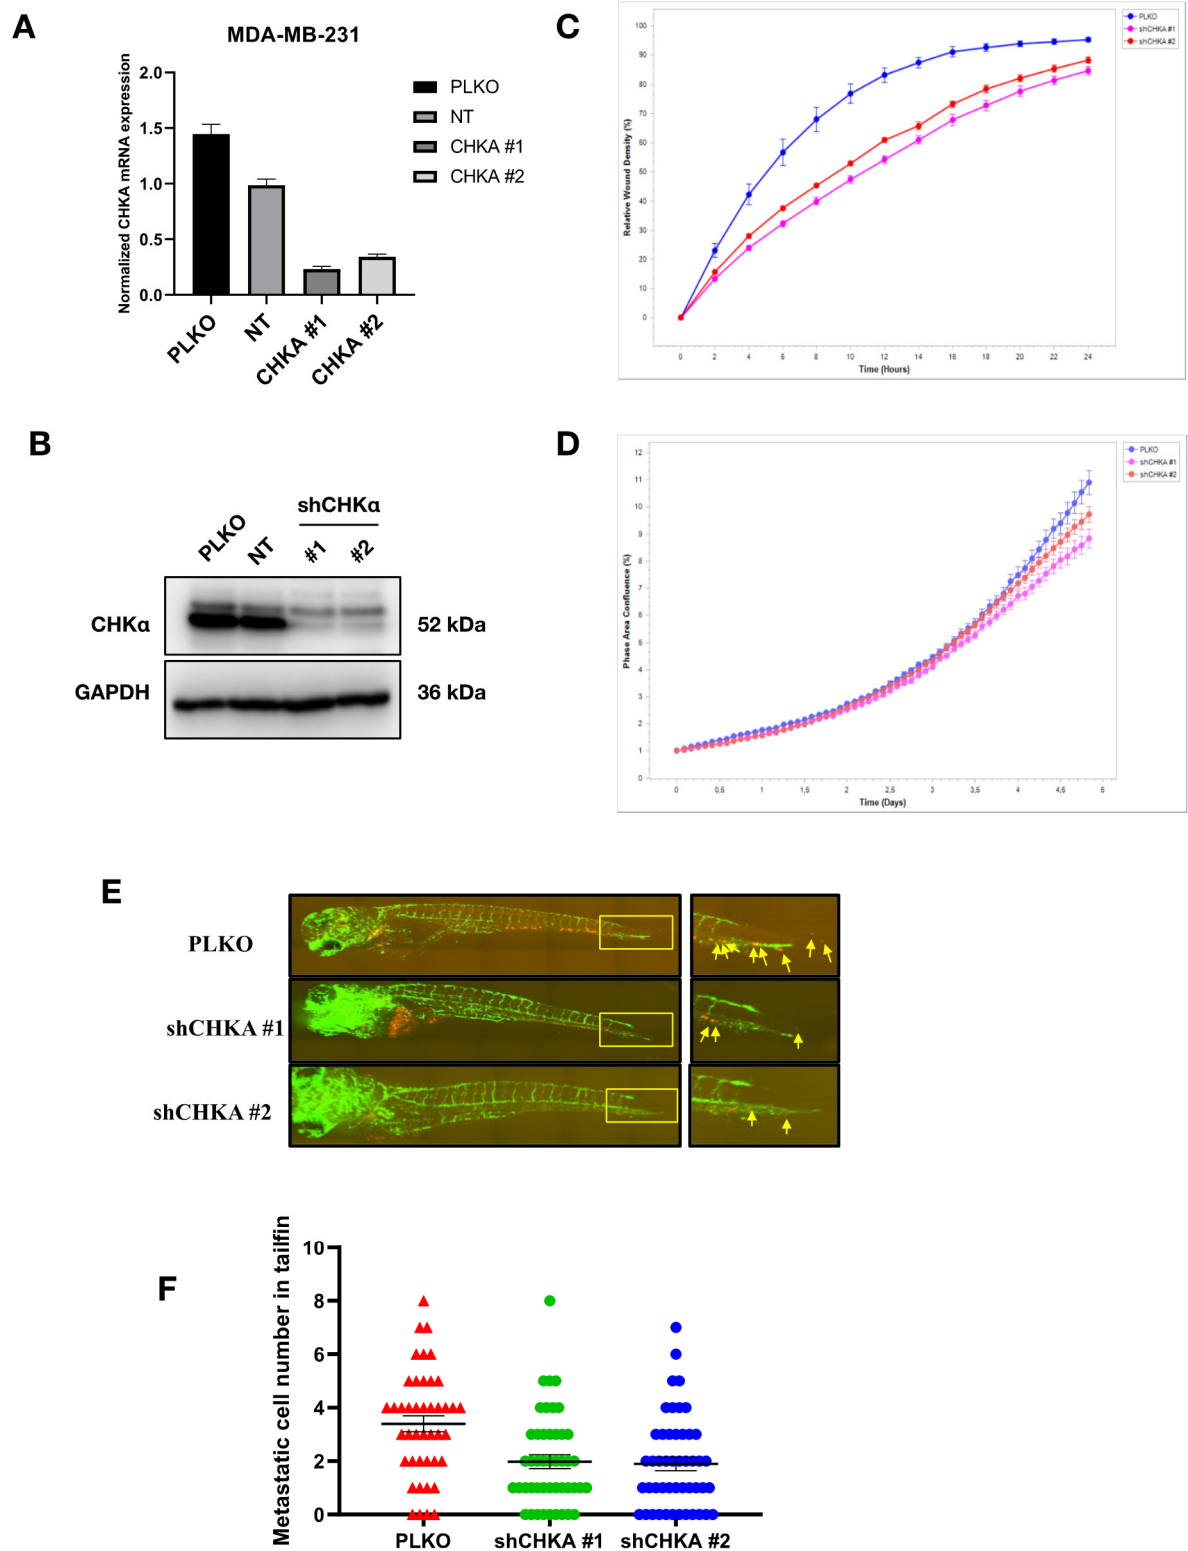

**Figure S5.** Depletion of  $CHK\alpha$  in MDA-MB-231 cancer cells inhibited migration and extravasation. A. shRNA targeting  $CHK\alpha$  inhibit its mRNA expression. PLKO, empty vector control; NT, non-targeting control. B. shRNA targeting  $CHK\alpha$  inhibit its encoded protein expression. PLKO, empty vector control; NT, non-targeting control. C. Effect of shRNA-mediated  $CHK\alpha$  knockdown on MDA-MB-231 cell proliferation was not significantly

affected. The proliferation was measured by analyzing the cell confluency using Incucyte standard module. PLKO-infected cells were used as control. D. Inhibitory effect of shRNA-mediated *CHKα* depletion on MDE-MB-231 cell migration. Migration was measured using Incucyte scratch wound analysis module. PLKO-infected cells were used as control. E. shRNA-mediated depletion of *CHKα* in MDA-MD-231 cells inhibited extravasation. Control (PLKO-infected) cells and shRNA-mediated depleted *CHKα* MDA-MB-231 cells were injected into the blood circulation of 48 hpf zebrafish. Representative images of the zebrafish at 6 days post-injection are shown. F. Quantification of the results shown in (E). The number of cells that extravasated in the posterior tail fin was calculated at 6 dpi.

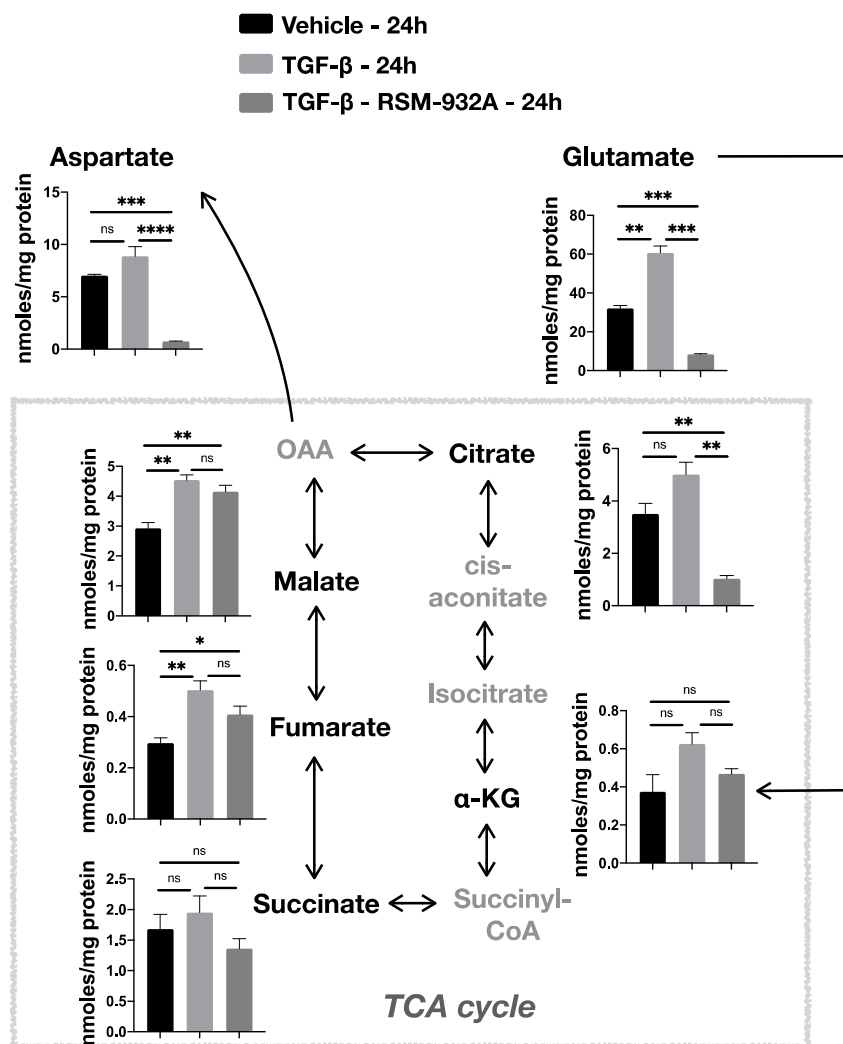

**Figure S6.** Effect of TGF-β in the absence and presence of RSM-932A on TCA cycle intermediates in MCF10A-Ras cells. TGF-β induced an increase in TCA cycle intermediates in MCF10A-Ras, and this was decreased by

\*\*\* $p < 0.001$ ; \*\*\*\* $p < 0.0001$ ; ns, non-significant.  $\alpha$ KG,  $\alpha$ -ketoglutarate; TCA, Tricarboxylic acid cycle.

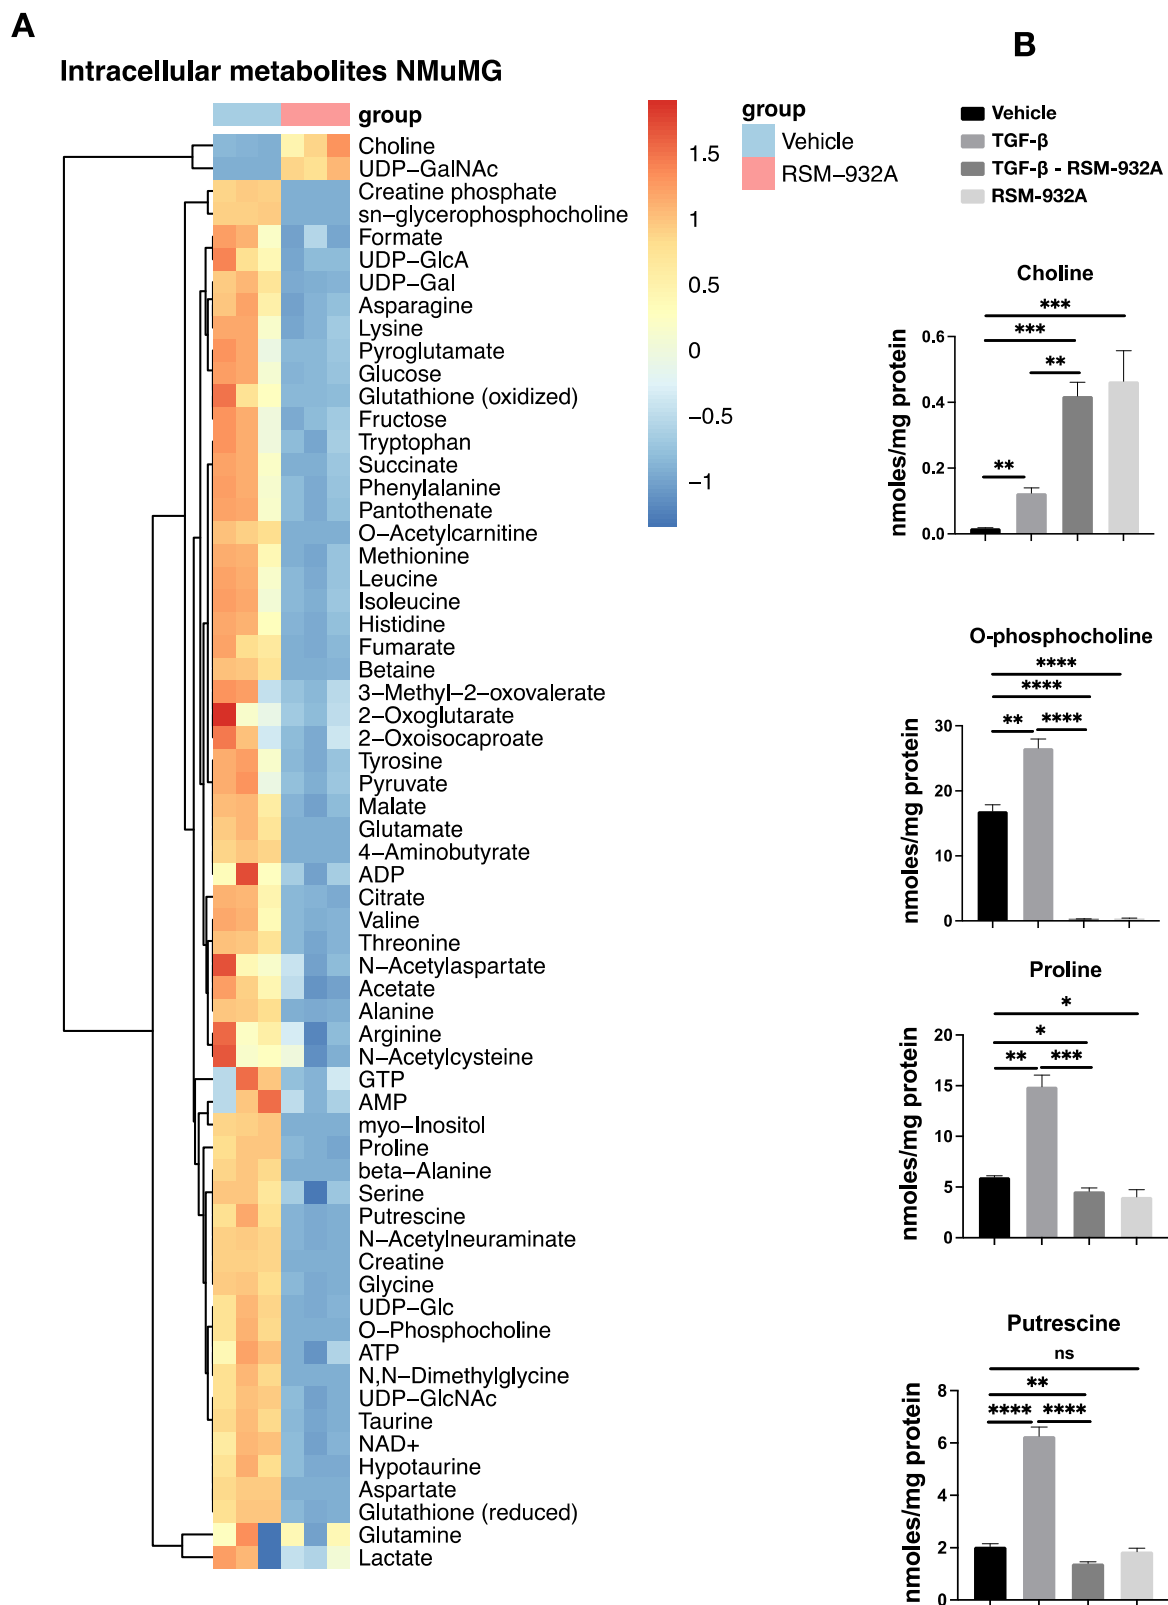

**Figure S7.** Analysis of RSM-932A and/or TGF- $\beta$  treatment in NMuMG cells on choline metabolism. A. Analysis of RSM-932A (10 $\mu$ M) -induced intracellular metabolic changes in NMuMG after 24 h treatment. B. Analysis of changes in choline, O-phosphocholine, proline and putrescine levels in response to RSM-932A (10 $\mu$ M) and/or TGF- $\beta$  (5ng/mL) treatment in NMuMG cells. Results of three biological replicates are shown as mean  $\pm$  s.d; \* $p$ <0.05; \*\* $p$ < 0.01; \*\*\*\* $p$ < 0.0001; ns, non-significant.

**Supplementary Table S1**  List of RT-qPCR primers.

| Gene           |         | Sequence (5' to 3')     |
|----------------|---------|-------------------------|
| <b>CPT</b>     | Forward | ACCGGAACAGGTTCAAGTTCTTT |
|                | Reverse | TGAAACAGCAGCAGCAAGAGA   |
| <b>PCYT1A</b>  | Forward | TGACCCCCGGAGCAGTAAAT    |
|                | Reverse | CTTTTAATCGGTCATGGTCCCGT |
| <b>PCYT1B</b>  | Forward | GAGACGAAAGAAAGTTGGGGC   |
|                | Reverse | GTCAGGGTCTTGCGTGAGAA    |
| <b>CHKA</b>    | Forward | GCCTACCTGTGGTGTAAAGGAA  |
|                | Reverse | ACCACCCCTGATGACACTGA    |
| <b>SLC44A1</b> | Forward | AAGGGAAGGAAAACGCTTGTG   |
|                | Reverse | GCTCTGCTCCAGGCTTTCAA    |
| <b>SLC44A4</b> | Forward | AGACTGAGCCATGGGGAGAA    |
|                | Reverse | GCAGCCCCTGTTTTTGATGG    |
| <b>SLC5A7</b>  | Forward | TGCTGTCTTTTGCAACCCAG    |
|                | Reverse | TCCCAAGTCAAGTCGTCTGC    |
| <b>CHAT</b>    | Forward | AAATGGCGTCCAACGAGGAT    |
|                | Reverse | CCCGGTTGGTGGAGTCTTTT    |
| <b>PEMT</b>    | Forward | AGGCTTCGGCAATATCGACT    |
|                | Reverse | CCATCTCGCTACCACATTCCA   |
| <b>ALDOA</b>   | Forward | GGCAGTGGGAGGCAATATCT    |
|                | Reverse | GCAGTGCTTTCCGGTCTTTAG   |
| <b>PGI</b>     | Forward | TACGAACACGGCCAAAGTGA    |
|                | Reverse | AGTCCAATGGCTGACCACAG    |
| <b>GLUT1</b>   | Forward | GGGTCTTAAGTGCGTCAGGG    |
|                | Reverse | TCACCTTCTTGCTGCTGGG     |
| <b>HK2</b>     | Forward | TCGGTTTCTCTATTTGGCCCC   |
|                | Reverse | GGTCAACCTTCTGCACTTGG    |
| <b>PFKFB3</b>  | Forward | AGAGGTCAGAGAACATGAAGAGC |
|                | Reverse | TTGGCCTCGAGAAGATGAGC    |
| <b>PHGDH</b>   | Forward | ATGTCATCAGCTGTCCCCAC    |
|                | Reverse | GCGTTCACAACGCCTGTTAG    |
| <b>GAPDH</b>   | Forward | GGCAAATTCAACGGCACAGT    |
|                | Reverse | TAGGGCCTCTCTTGCTCAGT    |
| <b>LDHA</b>    | Forward | GATGGCAACCCTCAAGGACC    |
|                | Reverse | TCATCCGCCAAGTCCTTCATT   |
| <b>LDHB</b>    | Forward | GGTGGACAGGGAATGTACGG    |
|                | Reverse | GAGCGACCTCATCGTCCTTC    |
| <b>LDHC</b>    | Forward | CGGAGTCAGCAGTAAGGCTC    |
|                | Reverse | GCCATGCCACATTTCCAAC     |
| <b>MPC1</b>    | Forward | GACTCCACGGTAGATGCAC     |
|                | Reverse | ACAGAGGGCGAAAGTCATCC    |

**Supplementary Table S1**–. List of RT-qPCR primers (*continued*).

|                |         |                           |
|----------------|---------|---------------------------|
| <b>MPC2</b>    | Forward | TTGAGGCCGCTTTACAACCA      |
|                | Reverse | CAGCACACACCAATCCCCAT      |
| <b>PDHA1</b>   | Forward | AGATGCTTGCCGCTGTATCC      |
|                | Reverse | GCCGATGAAGGTCACATTCTTAAT  |
| <b>PKLR</b>    | Forward | AAAATTGGCCCAGAGGGACT      |
|                | Reverse | CCGAAGCGCAGATCCAAAAG      |
| <b>PKM1</b>    | Forward | AGCACCTGATAGCTCGGGA       |
|                | Reverse | GAGGTCTGTGGAGTGACTGG      |
| <b>LDHAL6B</b> | Forward | GAGAAATGGGGCGATGTCCA      |
|                | Reverse | GCCAATGGCCCAGGAAGTAT      |
| <b>PDK1</b>    | Forward | GCAGACAGCTTACCTGAATCCT    |
|                | Reverse | ACTGACCCGGTCTATAAAGTAATCC |
| <b>PDK2</b>    | Forward | GGAGGTGCTAACAGGGGAAC      |
|                | Reverse | TGCTGGATCCTCATGGTAAGTT    |
| <b>PDK3</b>    | Forward | TAGGGAGTATCGACCCCACC      |
|                | Reverse | TTTGGCGCTTTGGCATTGAA      |
| <b>PDK4</b>    | Forward | GCTGCTGGACTTTGGTTCAGA     |
|                | Reverse | TTCAGGATATTGGCCAGGCG      |
| <b>ACO2</b>    | Forward | CATGTGGCCTCTGTCTGTG       |
|                | Reverse | GTTCAACCGTTTACGGACAATGTTA |
| <b>MDH1</b>    | Forward | ATGATGGGTGTTCTGGACGG      |
|                | Reverse | GTCCGTTGCAATGACATCCTG     |
| <b>MDH2</b>    | Forward | AGAGTGGAGGTCGTTGGAGT      |
|                | Reverse | CATTGTTCTGGGCCGAAGTG      |
| <b>CS</b>      | Forward | TGGGAGCCAAGAACTCATCC      |
|                | Reverse | TGTCTTCCCATGTTGCTGCT      |
| <b>FH</b>      | Forward | ATGCCAGGAAAGGTGAACCC      |
|                | Reverse | ACAGCAACGTGATTCCCCAT      |
| <b>IDH1</b>    | Forward | GCCAGTCGCTGTTACCGTAT      |
|                | Reverse | TCAATAACCCTCTTCACTCTGGAC  |
| <b>IDH2</b>    | Forward | GACAGTCACCCGCCATTACC      |
|                | Reverse | AGCGTCTGTGCAAACCTGATA     |
| <b>OGDH</b>    | Forward | CCCTGGGGATTTTGATGCT       |
|                | Reverse | TGTAGGCCATAGAACCCTCCT     |
| <b>SUCLA2</b>  | Forward | ACGGGTCGGA CT CAGAAATG    |
|                | Reverse | ACATCCTTTGATCCTGGGCG      |
| <b>SUCLG1</b>  | Forward | TACGGAAGGTATTCCGCAGC      |
|                | Reverse | TTCTCCAGGGTTGATGACGC      |
| <b>GDH1</b>    | Forward | AGGGTTTTATTGGTCCTGGCA     |
|                | Reverse | ATGGTGCTGGCATAGGTGTC      |
| <b>GLS2</b>    | Forward | CAGCACTCGGATCATGACG       |
|                | Reverse | CAGTCCAGTGGCCTTCAGAG      |
| <b>GOT1</b>    | Forward | CACCAACCTGGGAGAACCAT      |

**Supplementary Table S1**:- List of RT-qPCR primers (*continued*).

|                |         |                         |
|----------------|---------|-------------------------|
|                | Reverse | CTCCGCATCCCAGTAGCAAT    |
| <b>GOT2</b>    | Forward | GGGGCCAGTTTCTGCAAAG     |
|                | Reverse | AGATGGGCGTGTGATTTC      |
| <b>SLC1A5</b>  | Forward | TCGTCTTTGGTGTGGCTCTG    |
|                | Reverse | AACGGGTGCGTACCACATAA    |
| <b>SLC7A5</b>  | Forward | CTGGTCTTCGCCACCTACTT    |
|                | Reverse | GCCTTTACGCTGTAGCAGTTC   |
| <b>GLS1</b>    | Forward | CCGCGGGCGACAATAAAATA    |
|                | Reverse | GGGATCAGATGTTTCGAATCC   |
| <b>6PGDH</b>   | Forward | CTCCTCGACTCTGCTTCGTC    |
|                | Reverse | TGAAAGCACAGACCACAAATCC  |
| <b>6PGL</b>    | Forward | ACTCAAGATACAAGGGCCGC    |
|                | Reverse | CGTTGAAGCAGATCCTTGCG    |
| <b>G6PD2</b>   | Forward | GGTCGTGGGGGCTATTTTGA    |
|                | Reverse | TCTGAATCTGTGGTAGCAGGC   |
| <b>G6PDX</b>   | Forward | GAACGGTGGGACGGGGTA      |
|                | Reverse | CTGCCACGTCTCGGAACTG     |
| <b>RPE</b>     | Forward | CCTGGATGCACCCTGCTC      |
|                | Reverse | CTAGCTGCTTTCGGAGGCTT    |
| <b>RPI</b>     | Forward | CCCAGAGATTGACCTTGCCA    |
|                | Reverse | ACTTGCATAACCAGCCACGA    |
| <b>TALDO</b>   | Forward | CAACGAAGACCAAATGGCCG    |
|                | Reverse | CATTCGTTCCGTGAGCATCC    |
| <b>TKT</b>     | Forward | TGTCCCGAAACAAGCCTTCA    |
|                | Reverse | ACTCGGTAGCTGGCTTTGTC    |
| <b>GNPNAT1</b> | Forward | CCGCTCCAGTGCGACTTTA     |
|                | Reverse | GGATGCGTTGGAGAAATGGC    |
| <b>OGT</b>     | Forward | AGCTATCGAACTGCAACCCC    |
|                | Reverse | TTCAGCAAACTGCCCTTCT     |
| <b>PGM3</b>    | Forward | TTATTCAACCAGGTCGCGGA    |
|                | Reverse | AGAGGGCCGTACAAAAGCTC    |
| <b>GFPT1</b>   | Forward | TCTGATGCAAGTGCCGTGAT    |
|                | Reverse | GATGGTCTCCTGCAGTTCGT    |
| <b>GFPT2</b>   | Forward | ATCCTAGCCGAGAGCTGAA     |
|                | Reverse | GTATGATTGGGCGACCCTGG    |
| <b>UAP1</b>    | Forward | CATCCCCGCAGTGCTAC       |
|                | Reverse | AGGCCCTCTCCAGCATAAGA    |
| <b>HAS2</b>    | Forward | CGTGGATTATGTACAGGTGTGTG |
|                | Reverse | TCCTCCAACACCTCCAACCA    |
| <b>B3GNT9</b>  | Forward | CGTCACCCTGTCCAGACTTTG   |
|                | Reverse | CATCCACTCTGTGACCTCC     |
| <b>BCAT1-1</b> | Forward | ACCCGCCACGCCAAAC        |
|                | Reverse | TTACTGCAGTCCTGGCGG      |

**Supplementary Table S1**:- List of RT-qPCR primers (*continued*).

|                |         |                         |
|----------------|---------|-------------------------|
| <b>BCAT1-2</b> | Forward | GATACAAATCACTGGAGGGG    |
|                | Reverse | GGAAGATGGAGAGCTGGG      |
| <b>BCAT2</b>   | Forward | TATGGACCCACTGTGGCTGT    |
|                | Reverse | AGCTCCAGTACTCCGTCTTCA   |
| <b>BHMT</b>    | Forward | GAGGCAGTTCGTCAGCTTCA    |
|                | Reverse | TCGGGGTTCCAATCCAAAGG    |
| <b>MTHFD1</b>  | Forward | CTGACCCAGACAGACAAGGC    |
|                | Reverse | ATGCCTAGCCTCCGTAACCT    |
| <b>MTHFD1L</b> | Forward | TTTGGTGGGAACGATGAGCA    |
|                | Reverse | CCAGCCTTGACCGCATCTT     |
| <b>MTHFR</b>   | Forward | GAGCAGATCGGGATGAACCA    |
|                | Reverse | GATTCCTGCTGATAGAGGGTGG  |
| <b>MTR</b>     | Forward | AGGAATACTTGCTGGCTGGAG   |
|                | Reverse | GTTCAATCCGGTAGGCCAAGT   |
| <b>SHMT1</b>   | Forward | CCACGCTCCTAATAACAAGGCA  |
|                | Reverse | TGCTGTAAACCTCGGCATCA    |
| <b>SHMT2</b>   | Forward | ACCCCGGTACTACACCGATA    |
|                | Reverse | AGCTGACCACATCTCCGAGT    |
| <b>DHFR</b>    | Forward | AGGATTTTATCCCCGCTGCC    |
|                | Reverse | GTACTTGAACCTCGTTCCTGAGC |
| <b>CA9</b>     | Forward | AAGACAGGATGGAGGAGTCCC   |
|                | Reverse | TGGCCACCCCCTTTTTCATC    |
| <b>CA12</b>    | Forward | TGGATGATCCTACCCCCAGA    |
|                | Reverse | GGATGATACCTTGTCGGAAGGAG |
| <b>ODC</b>     | Forward | TCCCTGTCACATCGAGAACC    |
|                | Reverse | CCGCAACATAGAACGCATCC    |
| <b>DDAH1</b>   | Forward | TGCGTGTTTCGTGGAGGAC     |
|                | Reverse | ATGTCAACCTCCTTCCTGCG    |
| <b>MICAL2</b>  | Forward | CCCCCAGTACGTTTCAGCC     |
|                | Reverse | TTGCCAAGAAAATCAGTCACCTT |
| <b>PLPP3</b>   | Forward | CCTGGCGATCATTACAGGGG    |
|                | Reverse | TGCCACATACGGGTTCTGAG    |
| <b>PLPP4</b>   | Forward | ACCTACCCGCCTCATGTTTG    |
|                | Reverse | GAGCCAAGGACACTGCTAAGA   |
| <b>PLCB4</b>   | Forward | AAAGAGTTCCGAACCCGCAT    |
|                | Reverse | TCAGGCAGGATCACCTTTCG    |
| <b>SULF1</b>   | Forward | ATTAAGAGAAGGAAGGCTGCCC  |
|                | Reverse | CTCAGCACCTGAAAATACTGCG  |
| <b>GPX8</b>    | Forward | AAGGCAAAGCTTCCCTGGTT    |
|                | Reverse | GATAGGGCCCCGAACCTCCTTG  |
| <b>SPHK1</b>   | Forward | TCCTGGGCAACACCGATAAG    |
|                | Reverse | CGAGGGCATTCTACTGGTTCC   |
| <b>AOX1</b>    | Forward | AGAACGGAAGCTGGAGTGTG    |

**Supplementary Table S1:** List of RT-qPCR primers (*continued*).

|               |         |                        |
|---------------|---------|------------------------|
| <b>CYP1B1</b> | Reverse | CCGCCTATGTGTATTTACCTTC |
|               | Forward | TGTGCCTGCCACTATTACGG   |
|               | Reverse | CTGAACATCCGGGTATCTGGT  |

**Supplementary Table S2:** Changes in extracellular metabolites in the absence or presence of TGF- $\beta$  or RSM-932A, and TGF- $\beta$ -induced intracellular metabolites in MCF10A-Ras cells. This Table is provided in an excel sheet format.

**Supplementary Table S3:** TGF- $\beta$ -induced kinetic effects on gene expression encoding metabolic enzymes in NMuMG cells. This Table is provided in an excel sheet format.
